# Supplementary material for: Myoferlin Is a Yet Unknown Interactor of the Mitochondrial Dynamics’ Machinery in Pancreas Cancer Cells
Source: MDPI journal article supplement (doi:10.3390/cancers12061643), 2020-06-21
Supplement: s1 [file s1]

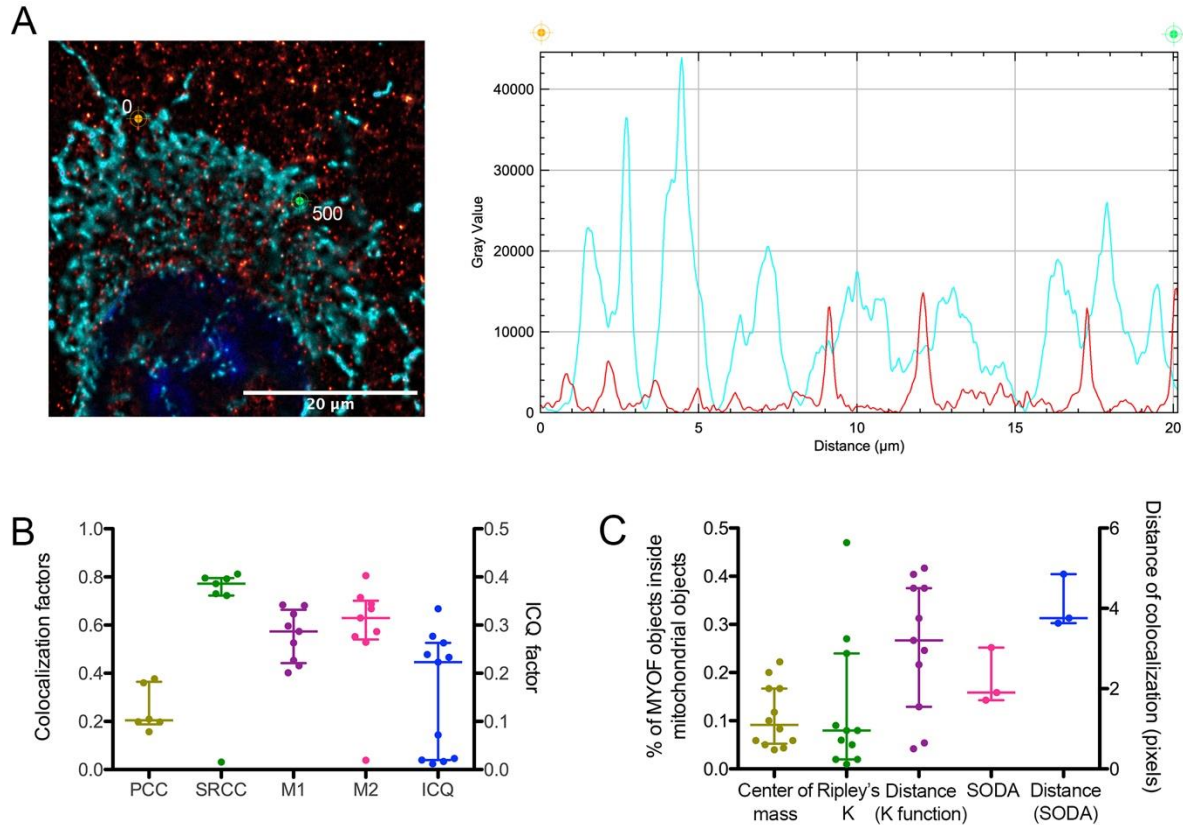

**Figure S1. Myoferlin was colocalized with mitochondria in Panc-1 cells.** (A) Deconvoluted confocal image of nuclei (blue), myoferlin (HPA - “hot” red scale), mitochondria (113-1 - “cold” cyan scale). Scale bar = 20  $\mu\text{m}$ . Channel intensity profile was established following the segment between orange (0-pixel position) and green (500-pixel position) cross marks. (B) Pearson (PCC), Spearman rank (SRCC) correlation coefficients, Manders’ colocalization coefficients (M1, M2), and intensity correlation quotient (ICQ) calculated on 11 independent microscopic fields. (C) Percentage of myoferlin-positive objects (N=7365) with center of mass overlapping mitochondrial object (N=273), percentage of myoferlin-positive object colocalizing mitochondrial object calculated by fitting of the Ripley’s K function or by statistical object distance analysis (SODA). Colocalization distances in pixels were measured in both cases.

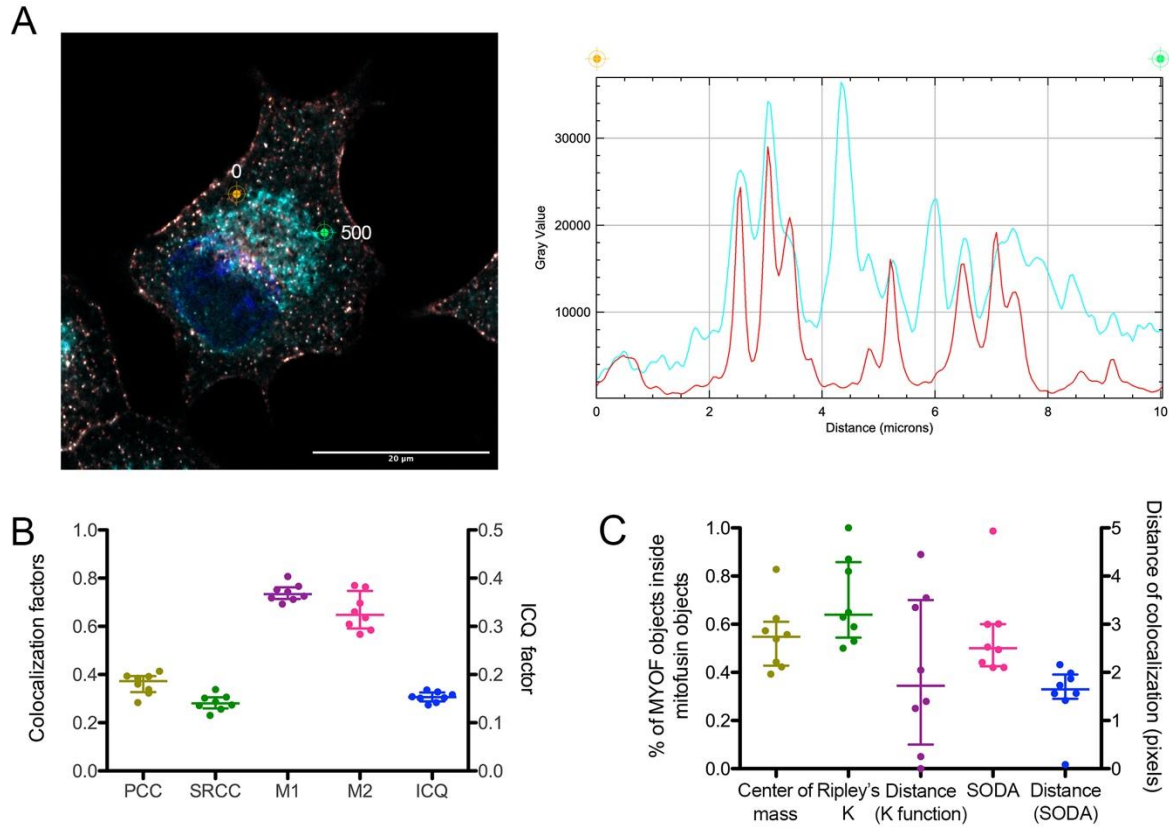

**Figure S2. Myoferlin was colocalized with mitofusins in Panc-1 cells.** (A) Deconvoluted confocal image of nuclei (blue), myoferlin (HPA - “hot” red scale), mitofusin-1/2 (3C9 - “cold” cyan scale). Scale bar = 20  $\mu\text{m}$ . Channel intensity profile was established following the segment between orange (0-pixel position) and green (500-pixel position) cross marks. (B) Pearson (PCC), Spearman rank (SRCC) correlation coefficients, Manders’ colocalization coefficients (M1, M2), and intensity correlation quotient (ICQ) calculated on 8 independent microscopic fields. (C) Percentage of myoferlin-positive objects (N=7128) with center of mass overlapping mitofusin-positive object (N=369), percentage of myoferlin-positive object colocalizing mitofusin-positive object calculated by fitting of the Ripley’s K function or by statistical object distance analysis (SODA). Colocalization distances in pixels were measured in both cases.

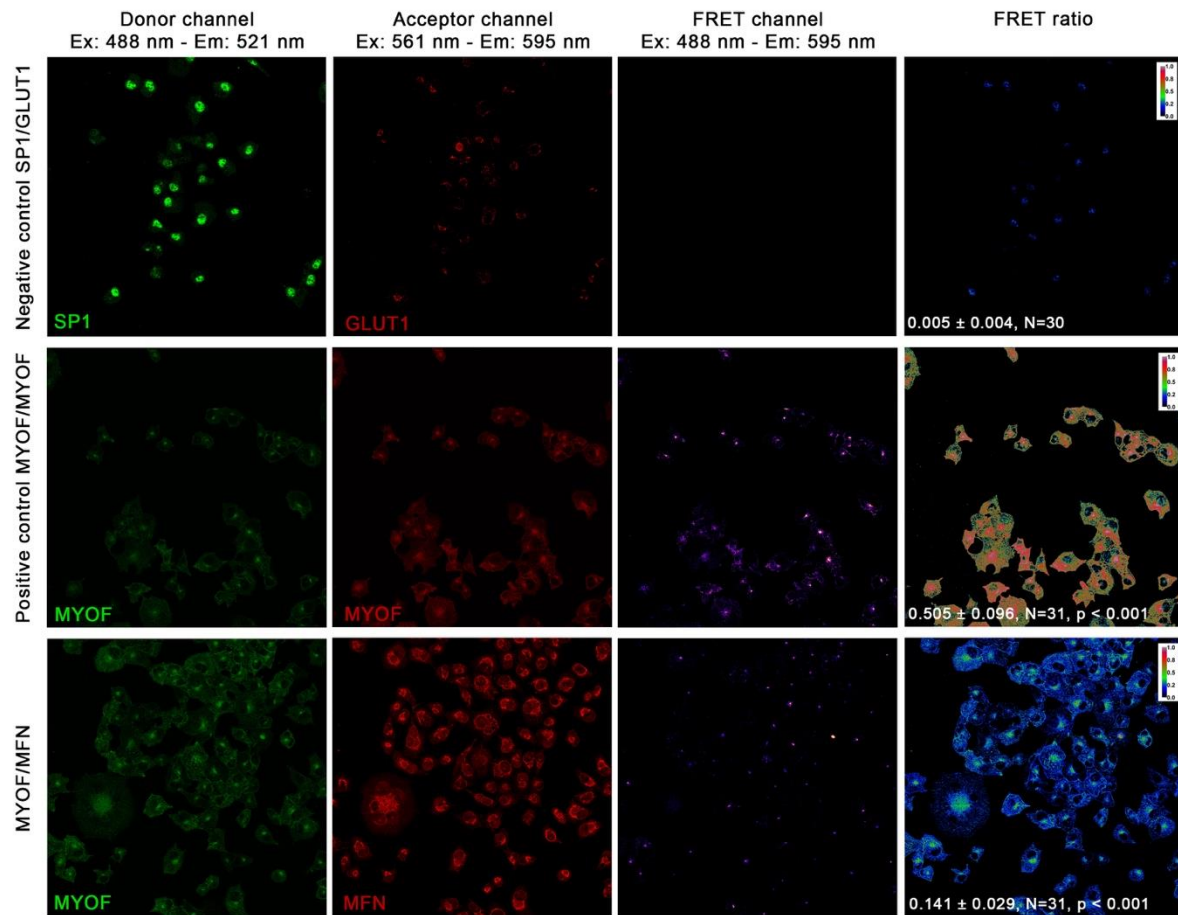

**Figure S3. Fluorescence resonance energy transfer showing myoferlin and mitofusins proximity in Panc-1 cell line.** Confocal images of myoferlin (HPA - green) and mitofusin-1/2 (3C9 - red) immunofluorescence. Fluorescence resonance energy transfer (FRET) channel was represented with “fire” color scale. FRET ratio was represented with a “rainbow” color scale associated with mean ± standard deviation.

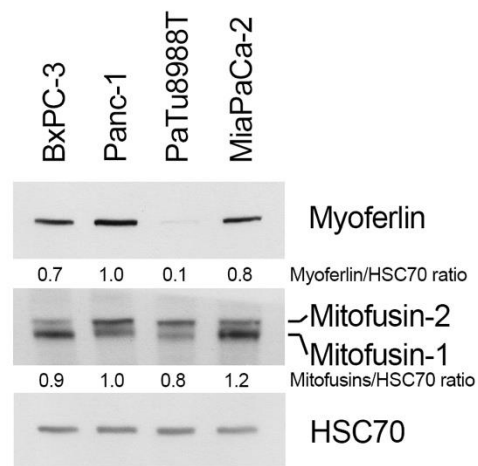

**Figure S4. Myoferlin and mitofusins abundance in PDAC cell lines.** Western-blot of 20  $\mu$ g protein samples from PDAC cell lines. Myoferlin and mitofusins were detected on the same membrane. HSC70 was used as a loading control. Relative quantification was performed using ImageJ.
